# Supplementary material
Source: publisher figshare collection journal article supplement (https://rs.figshare.com/ndownloader/files/9464512)
Supplement: Supplementary file [file 9464512]

# “On Three-Dimensional Misorientation Spaces”

## Electronic Supplementary Material

Robert Krakow<sup>1</sup>, Robbie J. Bennett<sup>1</sup>, Duncan N. Johnstone<sup>1</sup>, Zoja Vukmanovic<sup>2</sup>, Wilberth Solano-Alvarez<sup>1</sup>, Steven J. Lainé<sup>1</sup>, Joshua F. Einsle<sup>1:2</sup>, Paul A. Midgley<sup>1</sup>, Catherine M.F. Rae<sup>1</sup> and Ralf Hielscher<sup>3</sup>

<sup>1</sup> Department of Materials Science and Metallurgy, University of Cambridge, 27 Charles Babbage Road, Cambridge, CB3 0FS, UK

<sup>2</sup> Department of Earth Sciences, University of Cambridge, Downing Street, Cambridge, CB2 3EQ, UK

<sup>3</sup> Applied Functional Analysis, TU Chemnitz, Germany

### List of ESM files

| ESM file 1 (section3) |                                                            |
|-----------------------|------------------------------------------------------------|
| Title                 | Matlab script                                              |
| Legend                | Running this Matlab script generates Figures in Section 3. |

| ESM file 2 (section 4a) |                                                             |
|-------------------------|-------------------------------------------------------------|
| Title                   | Matlab script generating Figures in Section 4a              |
| Legend                  | Running this Matlab script generates Figures in Section 4a. |

| ESM file 3 (case_study_1_bainite_data) |                                                                                              |
|----------------------------------------|----------------------------------------------------------------------------------------------|
| Title                                  | CTF file containing data corresponding to ESM file 2                                         |
| Legend                                 | This file contains the raw EBSD data corresponding with ESM file 2, save in same repository. |

| ESM file 4 (section 4b) |                                                             |
|-------------------------|-------------------------------------------------------------|
| Title                   | Matlab script generating Figures in Section 4b              |
| Legend                  | Running this Matlab script generates Figures in Section 4b. |

| ESM file 5 (case_study_2_titanium_data.crp) |                                                                                              |
|---------------------------------------------|----------------------------------------------------------------------------------------------|
| Title                                       | CRP file containing data corresponding to ESM file 4                                         |
| Legend                                      | This file contains the raw EBSD data corresponding with ESM file 4, save in same repository. |

| ESM file 6 (case_study_2_titanium_data.crc) |                                                                                              |
|---------------------------------------------|----------------------------------------------------------------------------------------------|
| Title                                       | CRC file containing data corresponding to ESM file 4                                         |
| Legend                                      | This file contains the raw EBSD data corresponding with ESM file 4, save in same repository. |

| ESM file 7 (section 4c) |                                                             |
|-------------------------|-------------------------------------------------------------|
| Title                   | Matlab script generating Figures in Section 4c              |
| Legend                  | Running this Matlab script generates Figures in Section 4c. |

|                                           |                                                                                              |
|-------------------------------------------|----------------------------------------------------------------------------------------------|
| ESM file 8 (case_study_3_superalloy_data) |                                                                                              |
| Title                                     | CRP file containing data corresponding to ESM file 7                                         |
| Legend                                    | This file contains the raw EBSD data corresponding with ESM file 7, save in same repository. |

|                          |                                                              |
|--------------------------|--------------------------------------------------------------|
| ESM file 9 (section 4d1) |                                                              |
| Title                    | Matlab script generating Figures in Section 4d1              |
| Legend                   | Running this Matlab script generates Figures in Section 4d1. |

|                                            |                                                                                              |
|--------------------------------------------|----------------------------------------------------------------------------------------------|
| ESM file 10 (case_study_4a_anorthite_data) |                                                                                              |
| Title                                      | CRP file containing data corresponding to ESM file 9                                         |
| Legend                                     | This file contains the raw EBSD data corresponding with ESM file 9, save in same repository. |

|                           |                                                              |
|---------------------------|--------------------------------------------------------------|
| ESM file 11 (section 4d2) |                                                              |
| Title                     | Matlab script generating Figures in Section 4d2              |
| Legend                    | Running this Matlab script generates Figures in Section 4d2. |

|                                              |                                                                                               |
|----------------------------------------------|-----------------------------------------------------------------------------------------------|
| ESM file 12 (case_study_4b_symplectite_data) |                                                                                               |
| Title                                        | CRP file containing data corresponding to ESM file 11                                         |
| Legend                                       | This file contains the raw EBSD data corresponding with ESM file 11, save in same repository. |

Files can be downloaded from:

<https://doi.org/10.17863/CAM.8815>
